# Supplementary material
Source: PubMed Central journal article supplement (PMC11017368)
Supplement: NIHMS1981302-supplement-Supplemental_Material.pdf [file NIHMS1981302-supplement-Supplemental_Material.pdf]

## Supplemental Online Content

Saag MS, Gandhi RT, Hoy JF, et al. Antiretroviral drugs for treatment and prevention of HIV infection in adults: 2020 recommendations of the International Antiviral Society–USA Panel. *JAMA*. doi:10.1001/jama.2020.17025

**eBox 1.** IAS–USA Antiretroviral Therapy Recommendations Panel

**eBox 2.** Working Sections of the IAS–USA Antiretroviral Therapy Recommendations Panel

**eBox 3.** Volunteer IAS–USA Board of Directors, May 2020

**eMethods.** Recommendations Development Process

**eTable 1.** Information Requested From Antiretroviral Drug Manufacturers

**eTable 2.** Summary of Evidence Collection

**eTable 3.** Search Terms Used and Results of EMBASE and PubMed Literature Searches

**eTable 4.** Frailty Assessment Tools

**eTable 5.** Frailty Index Variables

**eTable 6.** Selected Novel Antiretroviral Agents in Clinical Development

This supplementary material has been provided by the authors to give readers additional information about their work.

## eBox 1. IAS–USA Antiretroviral Therapy Recommendations Panel

Michael Saag, MD (Panel Chair)  
Professor of Medicine  
Jim Straley Chair in AIDS Research  
Director, Center for AIDS Research  
Associate Dean for Global Health, School of  
Medicine  
University of Alabama at Birmingham  
Birmingham, Alabama

Constance A. Benson, MD, MPH\*  
Professor of Medicine  
ID Training Program Director  
Director, Antiviral Research Center (AVRC)  
PI/Director, HIV/AIDS Clinical Trials Unit  
University of California San Diego  
San Diego, California

Susan P. Buchbinder  
Director, Bridge HIV  
San Francisco Department of Public Health  
Clinical Professor of Medicine and Epidemiology  
University of California San Francisco  
San Francisco, California

Carlos del Rio, MD\*  
Hubert Professor and Chair Department of Global  
Health  
Professor of Medicine  
Emory University School of Medicine  
Rollins School of Public Health  
Atlanta, Georgia

Joseph J. Eron, Jr, MD  
Professor of Medicine and Epidemiology  
Principal Investigator, AIDS Clinical  
Research Group  
The University of North Carolina at Chapel Hill  
Chapel Hill, North Carolina

Gerd Fätkenheuer, MD  
University Hospital of Cologne  
Cologne, Germany

Rajesh T. Gandhi, MD  
Professor of Medicine  
Harvard Medical School  
Boston, Massachusetts

Huldrych F. Günthard, MD  
Professor of Infectious Diseases  
President of the Swiss HIV Cohort Study  
Deputy Chief, Division of Infectious Diseases and  
Hospital Epidemiology  
University Hospital Zurich  
Zurich, Switzerland  
Jennifer F. Hoy, MBBS  
Professor of Medicine

The Alfred Hospital  
Monash University  
Melbourne, Australia

Raphael J. Landovitz, MD  
Associate Professor of Medicine  
Associate Director  
University of California Los Angeles Center for  
Clinical AIDS Research and Education  
University of California Los Angeles  
Los Angeles, California

Gerd Fätkenheuer, MD  
Professor  
University of Cologne  
Cologne, Germany

Jean-Michel Molina, MD, PhD  
Professor of Infectious Diseases  
University of Paris Diderot  
Paris, France

Paul E. Sax, MD  
Professor of Medicine  
Harvard Medical School  
Clinical Director, Division of Infectious Diseases  
Brigham and Women's Hospital  
Boston, Massachusetts

Davey M. Smith, MD  
Professor and Vice Chair of Faculty  
Department of Medicine  
Chief, Division of Infectious Diseases  
University of California San Diego  
Veterans Affairs San Diego Healthcare System  
La Jolla, California

Melanie A. Thompson, MD  
Principal Investigator  
AIDS Research Consortium of Atlanta  
Atlanta, Georgia

Paul A. Volberding, MD\*  
Professor of Medicine  
Co-Director, Center for AIDS Research  
Director, AIDS Research Institute  
University of California San Francisco  
San Francisco, California

\*IAS–USA Board of Directors liaison

## **eBox 2. Working Sections of the IAS–USA Antiretroviral Therapy Recommendations Panel**

- **When to Start**  
Section Team: Melanie A. Thompson, MD (Co-Leader), Gerd Fätkenheuer, MD (Co-Leader), Constance A. Benson, MD, Carlos del Rio, MD, and Paul A. Volberding, MD
- **Recommended Initial Regimes**  
Section Team: Rajesh T. Gandhi, MD (Co-Leader), Paul E. Sax, MD (Co-Leader), Constance A. Benson, MD, Joseph J. Eron, Jr, MD, Gerd Fätkenheuer, MD, Huldrych F. Günthard, MD, and Jennifer H. Hoy, MBBS
- **When and How to Switch**  
Section Team: Jennifer F. Hoy, MBBS (Leader), Carlos del Rio, MD, Joseph J. Eron, Jr, MD, Gerd Fätkenheuer, MD, and Rajesh T. Gandhi, MD, and Paul E. Sax, MD
- **Laboratory Monitoring**  
Section Team: Davey M. Smith, MD (Leader), Huldrych F. Günthard, MD, and Melanie A. Thompson, MD
- **Prevention**  
Section Team: Raphael J. Landovitz, MD (Leader), Susan P. Buchbinder, MD, Jean-Michel Molina, MD, PhD, and Michael S. Saag, MD
- **Aging and HIV**  
Section Team: Melanie A. Thompson, MD (Leader), Carlos del Rio, MD, Rajesh T. Gandhi, MD, Huldrych F. Günthard, MD, and Jennifer H. Hoy, MBBS
- **Cost**  
Section Team: Paul E. Sax, MD (Leader), Huldrych F. Günthard, MD, and Davey M. Smith, MD
- **Ending the Epidemic**  
Section Team: Carlos del Rio, MD (Leader), Raphael J. Landovitz, MD, and Melanie A. Thompson, MD
- **New Directions/Emerging Trends**  
Section Team: Joseph J. Eron, Jr, MD (Leader), Rajesh T. Gandhi, MD, Raphael J. Landovitz, MD, and Michael S. Saag, MD

**eBox 3. Volunteer IAS–USA Board of Directors, June 2020**

Paul A. Volberding, MD, Chair  
Professor of Medicine  
Co-Director, Center for AIDS Research  
Director, AIDS Research Institute  
University of California San Francisco  
San Francisco, California

Constance A. Benson, MD, MPH  
Professor of Medicine  
I.D. Training Program Director  
Director, Antiviral Research Center (AVRC)  
PI/Director, HIV/AIDS Clinical Trials Unit  
University of California San Diego  
San Diego, California

Peter C. Cassat, JD  
Culhane Meadows, PLLC  
Portland, Maine

Judith S. Currier, MD  
Professor of Medicine  
Chief, Division of Infectious Disease  
Associate Director, Clinical AIDS  
Research and Education Center  
David Geffen School of Medicine  
University of California Los Angeles  
Los Angeles, California

Carlos del Rio, MD  
Hubert Professor and Chair Department of  
Global Health  
Professor of Medicine  
Emory University School of Medicine  
Rollins School of Public Health  
Atlanta, Georgia

Roy M. Gulick, MD, MPH  
Rochelle Belfer Professor of Medicine  
Chief, Division of Infectious Diseases  
Weill Cornell Medicine  
New York, New York

Donna M. Jacobsen, BS  
Executive Director/President  
IAS–USA  
Executive Manager  
Conference on Retroviruses and Opportunistic  
Infections (CROI)  
San Francisco, California

Jeanne M. Marrazzo, MD, MPH  
Professor of Medicine  
Division of Infectious Diseases  
University of Alabama at Birmingham  
Birmingham, Alabama

Douglas D. Richman, MD  
Professor of Pathology and Medicine  
University of California San Diego and  
Veterans Affairs San Diego Healthcare  
System  
La Jolla, California

Michael S. Saag, MD  
Professor of Medicine  
Jim Straley Chair in AIDS Research  
Director, Center for AIDS Research  
Associate Dean for Global Health, School of  
Medicine  
University of Alabama at Birmingham  
Birmingham, Alabama

Robert T. Schooley, MD  
Professor of Medicine  
Head, Division of Infectious Diseases  
Vice Chair, Department of Medicine  
Senior Director, International Initiatives  
University of California San Diego  
La Jolla, California

## **eMethods. Recommendations Development Process**

### **I. Brief Summary**

The recommendations for antiretroviral therapy in adults with HIV infection recommendations were developed by an international panel of experts in HIV research and patient care. The Panel was established initially in 1995 by the International Antiviral Society–USA (IAS–USA) <sup>1</sup>; members are selected by the IAS–USA Board of Directors and vetted by the organization for suitability for the panel. Panel members serve in a volunteer (uncompensated) capacity and do not participate in industry promotional activities such as speakers' bureaus, paid lectures directly for industry, or other marketing activities during their tenure on the panel. Members of the current panel convened in person and by conference calls from October 2019 to June 2020. The chair (Michael S. Saag, MD) oversees the discussions of the process and evidence review and manuscript development, and guides the group to consensus. Section leaders (**eBox 2**) and teams were appointed to evaluate evidence and summarize panel discussions for each section. Prior to selection of the section teams and leaders, panel members declared their financial relationships with commercial concerns, discussed potential conflicts of interest (COIs), and recused themselves from serving as section leaders or team members as necessary.

Evidence considered for updating the recommendations was limited to data published in the scientific literature, presented at major peer-reviewed scientific conferences, or released as safety reports by regulatory agencies or data safety and monitoring boards, since the last update in January 2018 through August 2020. <sup>2</sup> Literature searches are conducted by a systematic review methodologist at the University of California San Francisco and Emory University. Publication list is reviewed by panel members (Carlos del Rio, MD, and Paul A. Volberding, MD) for relevance. Approximately 549 citations were ultimately identified from a list of more than 4980. Relevant abstracts publically presented at recent scientific conferences were identified by panel members. Manufacturers of antiretroviral drugs were asked to submit lists of relevant publications or abstracts meeting the established criteria. All reference lists, published papers, abstracts, and other relevant reports were organized and stored on a web-based, shared, electronic drive to which all panel members have ongoing access.

These recommendations focus on individuals with or at risk for HIV infection in international, developed-world settings where antiretroviral drugs are generally available (approved by regulatory bodies or available by expanded access). Recommendations were made by full-panel consensus and rated according to the strength of the recommendation and the quality of the supporting evidence (**Manuscript Table 1**). For areas in which recommendations have not changed substantially or no or few new data are available, the reader is referred to the previous report. <sup>3</sup>

### **II. Detailed Summary**

#### **a. Background**

The medical management of HIV changes rapidly, owing to the continued rapid advances in pathogenic and clinical knowledge leading to necessary changes in patient care, as well as ongoing availability of new drugs, formulations, and laboratory testing to optimally manage HIV infection. In 1995, on recognizing the rapidly changing knowledge base, the complexity of HIV management and expertise needed to provide quality care, and the lack of current plans to update any existing HIV guidelines, the need to disseminate reliable evidence-based guidance for clinicians involved in HIV management was clear. The IAS–USA International Antiretroviral Recommendations Panel was established in 1995 by the IAS–USA to develop this needed guidance for physicians and other clinicians actively involved in HIV care.

#### **b. The IAS–USA and Its Role in the Recommendations**

The IAS–USA is a 501(c)(3) not-for-profit, mission-based, nonmembership, educational organization that was established in 1992. The mission of the IAS–USA is to improve the treatment, care, and quality of life for people with HIV, hepatitis C virus (HCV), or other viral infections through high-quality, relevant, balanced, and needs-oriented education and information for practitioners who are actively involved in medical care. The IAS–USA delivers annual continuing medical education (CME) programs on HIV and HCV that include live courses; live intensive, interactive workshops; live webinars;);

and the peer-reviewed, indexed journal *Topics in Antiviral Medicine*.™ In addition, IAS–USA manages and serves as the CME sponsor for the annual HRSA-supported Clinical Conference for Ryan White HIV/AIDS Program Practitioners, and for the annual Conference on Retroviruses and Opportunistic Infections (CROI), a research conference.

The IAS–USA is accredited by the Accreditation Council for Continuing Medical Education (ACCME) to provide CME for physicians.

IAS–USA has sponsored the development of evidence-based recommendations for viral load monitoring, antiretroviral therapy, HIV drug resistance testing, cytomegalovirus (CMV) infection, and the metabolic complications of antiretroviral therapy, all of which are published in the medical literature.<sup>1,4-22</sup> In addition to the published recommendations, the IAS–USA served as the collaborating partner for the American Association for the Study of Liver Diseases (AASLD)/Infection Diseases Society of America (IDSA)/IAS–USA HCV Guidance ([www.HCVguidelines.org](http://www.HCVguidelines.org)) from its inception until January 2016.

The volunteer members of the IAS–USA Board of Directors (**eBox 3**) oversee the development of the information and educational programs and are not compensated for their roles in oversight and governance of the organization.

IAS–USA funding comes from a variety of sources. Largest single source of revenue is conference and CME participant registration fees. Other funding sources include grants from the pharmaceutical/diagnostics (commercial) industries, grants and subcontracts from government agencies, private donations, and gifts-in-kind from local community businesses and individuals. The commercial support that IAS–USA accepts is only for selected activities. One large national CME effort invites funding in the form of educational grants from industry. Per IAS–USA policy, any effort that uses commercial grants must receive grants from several companies with competing products. Funds are pooled and distributed to activities within the effort at the sole discretion of the IAS–USA. Funders have no input into any activity, including its content, development, or selection of topics or speaker(s). Funders are listed in each activity as applicable.

The development of the Antiretroviral Therapy Recommendations is supported and funded by the IAS–USA. The IAS–USA determined the need for updated recommendations; selected panel members based on expertise in research and care to represent developed-world settings affected by HIV disease; determined the most appropriate way in which to disseminate the information (eg, publication in a medical journal rather than publication in the IAS–USA journal, web publication, etc); and provided administrative oversight and financial support.

The Panel itself is responsible for proposing the design and conduct of the work; collection, management, analysis, and interpretation of the data; and preparation, review, and approval of the manuscript. IAS–USA provided staff support for administrative management, oversight of literature searches and editorial and production assistance. At least one member of the Board serves in each panel to ensure continuing with the IAS–USA mission.

### **c. Identifying and Screening Panel Members**

The panel was initially appointed in 1995, and members have rotated periodically since then. In evaluating potential participants for the Panel, the IAS–USA Board considered individuals who 1) are recognized as authorities in HIV treatment research and clinical care, 2) have appointments in major medical teaching or research institutions, 3) have a demonstrated ability to review and evaluate evidence in an effort to provide useful recommendations in the field, 4) meet the IAS–USA COI and financial relationship criteria for participation (see below and [www.iasusa.org](http://www.iasusa.org)), and 5) have the ability to work in a collaborative consensus process. In addition, the Board emphasized the need for an international, developed world perspective.

Like the IAS–USA Board of Directors, participants in IAS–USA panels are volunteers and receive no financial compensation for their panel participation. In joining the Panel, members agree to commit substantial time to the effort necessary for evidence review and for participation in the consensus process.

### **d. COI Management**

It is the policy of IAS–USA to ensure balance, independence, objectivity, and scientific rigor in all its activities. All parties with control over the content of IAS–USA activities are required to disclose to the organization and activity audience any financial interest or other relationship with the manufacturer(s) of any commercial product(s) or provider(s) of commercial services with interests discussed in the activity

(eg, presentation, article, etc) within at least the past 12 months. Financial interests or other relationships can include receipt of grants or research support, status as employee or consultant, stock or options holder, paid lecturer, paid lecturer, writer, or author, or member of speakers bureau, of the party or of his or her spouse or partner. The ACCME defines a financial interest as an interest of any dollar amount. Part of the IAS–USA policies to ensure the integrity of its activities is the policy to separate commercial promotion from core IAS–USA educational and informational activities. Individuals who conduct marketing or promotional activities for commercial firms may not contribute to core IAS–USA programs. A marketing or promotional activity includes any activity in which the commercial entity controls key elements, such as speaker or topic selection, that could be used to serve the entity’s commercial interests (eg, speakers bureaus, advertorials, etc). Individuals may not participate in most IAS–USA programs for 12 months after functioning in a promotional or marketing effort for a commercial firm. A notable exception to the separation policy is the annual Conference on Retroviruses and Opportunistic Infections (CROI) which allows research and symposia presentations by individuals with some of such relationships (including employment) because of its large focus on the presentations on original research, if their research or work passes rigorous peer review). Panel members who meet general criteria and are appointed, agree not to participate in any promotional activity on behalf of a pharmaceutical or medical device company (eg, serve on a speaker bureau, as a paid lecturer, or a similar contribution) while a member of the panel. Any conforming financial relationships with commercial entities that still may represent a real or potential COIs, will be resolved so that they do not influence the content of the recommendations. Prior to selection of the section teams and leaders, panel members declared their financial relationships with commercial concerns, discussed potential COIs, and recused themselves from serving as section leaders or team members accordingly.

### **III. The IAS–USA Antiretroviral Recommendations Panel**

The members of the IAS–USA Antiretroviral Recommendations Panel are listed in **eBox 1**. The Panel convened in person in December 2019 to June 2020, and regularly by conference call. The chair oversees the discussions of the process and evidence review and manuscript development, and guides the group to consensus. Section leaders and teams were appointed to evaluate evidence and summarize panel discussions for each section.

### **IV. Rating the Recommendations**

The Panel is divided by topic into working sections, each with a section leader. These sections are responsible for reviewing and screening evidence, developing preliminary recommendations, and presenting these to the full Panel for discussion, identification of further evidence, and consensus.

The selected rating system (**Manuscript Table 1**) combines 2 ratings for each recommendation. One rates the strength of the recommendation (strong, moderate, or limited support) and the other rates the quality of the evidence (ranging from Ia, based on evidence from 1 or more randomized controlled clinical trial[s] published in the peer-reviewed literature, to III, based on the Panel’s analysis of the accumulated available evidence).<sup>23</sup>

### **V. Content of the Recommendations**

The Panel agreed on the purpose, audience, and scope of these recommendations and on 9 main content sections (and subsections).

Content Sections:

1. When to Start
2. Recommended Initial Regimes
3. When and How to Switch
4. Laboratory Monitoring
5. Prevention
6. Aging and HIV
7. Cost
8. Ending the Epidemic
9. New Directions/Emerging Trends

Panel members were assigned to content sections based on their expertise and section leaders were appointed (**eBox 2**). The Panel Chair participates in all sections and reviews the entire manuscript, and Carlos del Rio, MD, and Paul A. Volberding, MD, oversaw the literature searches, reviewed search results, and identified relevant publications, and also reviewed the entire manuscript.

From October 2019 to August 2020, the panel met in person and by conference call and e-mail exchange. Initial discussions were used to develop detailed Section outlines, and assign participants to draft subsections. The full Panel reviewed sections and the final manuscript.

## VI. Evidence Collection and Literature Searches

Panel members were selected based on their active work in the field of HIV research and care, and detailed knowledge of available evidence (published and presented at major scientific conferences).

Literature searches in PubMed and Embase were conducted (see **eTable 2 and eTable 3** for search strategies and keywords). The initial literature search provided data available since the 2018 publication of the recommendations through May 2020; approximately 549 references were ultimately considered possibly relevant. For aging and HIV, a separate search was conducted which produced 336 more non-duplicated citations.

And additional (bridge) literature search was conducted in August 2020, approximately 915 references were identified. Relevant abstracts publically presented at recent scientific conferences were identified by panel members. All manufacturers of FDA-approved antiretroviral drugs were asked to submit lists of publications or abstracts meeting the established criteria (**eTable 1**). Drug manufacturers were instructed to provide references and electronic copies of the published or presented papers or abstracts only and not to comment on the design, methods, results or implications of any of the work. All reference lists, published papers, abstracts, and other relevant reports were organized and stored on a web-based, shared, electronic drive to which all panel members have ongoing access.

## eReferences

1. Carpenter CCJ, Fischl MA, Hammer SM, et al. Antiretroviral therapy for HIV infection in 1996: recommendations of an international panel. *JAMA*. 1996;276(2):146-154.  
Ref ID: 795
2. Günthard HF, Aberg JA, Eron JJ, et al. Antiretroviral treatment of adult HIV infection: 2014 recommendations of the International Antiviral Society-USA panel. *JAMA*. 2014;312(4):410-425.  
Ref ID: 13436
3. Günthard HF, Saag MS, Benson CA, et al. Antiretroviral drugs for treatment and prevention of HIV infection in adults: 2016 recommendations of the International Antiviral Society-USA panel. *JAMA*. 2016;316(2):191-210.  
Ref ID: 14475
4. Carpenter CCJ, Fischl MA, Hammer SM, et al. Antiretroviral therapy for HIV infection in 1997: updated recommendations of the International AIDS Society–USA panel. *JAMA*. 1997;277:1962-1969.  
Ref ID: 989
5. Carpenter CCJ, Fischl MA, Hammer SM, et al. Antiretroviral therapy for HIV infection in 1998: updated recommendations of the International AIDS Society–USA panel. *JAMA*. 1998;280:78-86.  
Ref ID: 1382
6. Carpenter CCJ, Cooper DA, Fischl MA, et al. Antiretroviral therapy for HIV infection in adults: updated recommendations of the International AIDS Society–USA panel. *JAMA*. 2000;283(3):381-390.  
Ref ID: 1978

7. Hammer SM, Eron JJ, Jr., Reiss P, et al. Antiretroviral treatment of adult HIV infection: 2008 recommendations of the International AIDS Society-USA panel. *JAMA*. 2008;300(5):555-570.  
Ref ID: 7755
8. Hammer SM, Saag MS, Schechter M, et al. Treatment for adult HIV infection: 2006 recommendations of the International AIDS Society-USA panel. *JAMA*. 2006;296:827-843.  
Ref ID: 6062
9. Thompson MA, Aberg JA, Cahn P, et al. Antiretroviral treatment of adult HIV infection: 2010 recommendations of the International AIDS Society-USA panel. *JAMA*. 2010;304(3):321-333.  
Ref ID: 9521
10. Thompson MA, Aberg JA, Hoy JF, et al. Antiretroviral treatment of adult HIV infection: 2012 recommendations of the International Antiviral Society-USA panel. *JAMA*. 2012;308(4):387-402.  
Ref ID: 11418
11. Yeni PG, Hammer SM, Carpenter CCJ, et al. Antiretroviral treatment for adult HIV-1 infection in 2002: updated recommendations of the International AIDS Society-USA panel. *JAMA*. 2002;288:222-235.  
Ref ID: 4066
12. Yeni PG, Hammer SM, Hirsch MS, et al. Treatment for adult HIV infection: 2004 recommendations of the International AIDS Society-USA panel. *JAMA*. 2004;292:251-265.  
Ref ID: 5128
13. Hirsch MS, Conway B, D'Aquila RT, et al. Antiretroviral drug resistance testing in adults with HIV infection: implications for clinical management. International AIDS Society–USA Panel. *JAMA*. 1998;279(24):1984-1991.  
Ref ID: 1304
14. Hirsch MS, Brun-Vézinet F, D'Aquila RT, et al. Antiretroviral drug resistance testing in adult HIV-1 infection: recommendations of an International AIDS Society-USA Panel. *JAMA*. 2000;283(18):2417-2426.  
Ref ID: 2244
15. Hirsch MS, Brun-Vézinet F, Clotet B, et al. Antiretroviral drug resistance testing in adults infected with human immunodeficiency virus type 1: 2003 recommendations of an International AIDS Society-USA panel. *Clin Infect Dis*. 2003;37:113-128.  
Ref ID: 4617
16. Hirsch MS, Günthard HF, Schapiro JM, et al. Antiretroviral drug resistance testing in adult HIV-1 infection: 2008 recommendations of an International AIDS Society-USA panel. *Clin Infect Dis*. 2008;47(2):266-285.  
Ref ID: 7276
17. Schambelan M, Benson CA, Carr A, et al. Management of metabolic complications associated with antiretroviral therapy for HIV-1 infection: recommendations of an International AIDS Society-USA panel. *JAIDS*. 2002;31(3):257-275.  
Ref ID: 3494
18. Whitley RJ, Jacobson MA, Friedberg DN, et al. Guidelines for the treatment of cytomegalovirus diseases in patients with AIDS in the era of potent antiretroviral therapy. *Arch Intern Med*. 1998;158:957-969.  
Ref ID: 1393

19. Saag MS, Holodniy M, Kuritzkes DR, et al. HIV viral load markers in clinical practice. *Nat Med*. 1996;2(6):625-629.  
Ref ID: 836
20. Martin DF, Dunn JP, Davis JL, et al. Use of the ganciclovir implant for the treatment of cytomegalovirus retinitis in the era of potent antiretroviral therapy: recommendations of the International AIDS Society–USA panel. *Am J Ophthalmol*. 1999;127(3):329-339.  
Ref ID: 2330
21. Saag MS, Benson CA, Gandhi RT, et al. Antiretroviral drugs for treatment and prevention of HIV infection in adults: 2018 recommendations of the International Antiviral Society-USA panel. *JAMA*. 2018;320(4):379-396.  
Ref ID: 15875
22. Gunthard HF, Calvez V, Paredes R, et al. HIV drug resistance: 2018 recommendations of the International Antiviral Society-USA panel. *Clin Infect Dis*. 2018;[Epub ahead of print]  
Ref ID: 15813
23. Canadian Task Force on the Periodic Health Examination. The periodic health examination. *Can Med Assoc J*. 1979;121(9):1193-1254.  
Ref ID: 11289
24. Fried LP, Tangen CM, Walston J, et al. Frailty in older adults: evidence for a phenotype. *J Gerontol A Biol Sci Med Sci*. 2001;56(3):M146-M156.  
Ref ID: 11265
25. Guralnik JM, Simonsick EM, Ferrucci L, et al. A short physical performance battery assessing lower extremity function: association with self-reported disability and prediction of mortality and nursing home admission. *J Gerontol*. 1994;49(2):M85-M94.  
Ref ID: 16587
26. Searle SD, Mitnitski A, Gahbauer EA, Gill TM, Rockwood K. A standard procedure for creating a frailty index. *BMC Geriatr*. 2008;8:24.  
Ref ID: 16586
27. Matthews P, Barrett SE, Patel M, et al. First-in-human trial of MK-8591-eluting implants demonstrates concentrations suitable for HIV prophylaxis for at least one year. Poster presented at: 10th IAS Conference on HIV Science (IAS 2019); July 21-24, 2019; Mexico City, Mexico.  
Ref ID: 16522
28. Molina JM, Yazdanpanah Y, Saud AA, et al. MK-8591 at doses of 0.25 to 2.25 mg QD, in combination with doravirine establishes and maintains viral suppression through 48 weeks in treatment-naïve adults with HIV-1 infection. Poster presented at: 10th IAS Conference on HIV Science (IAS 2019); July 21-24, 2019; Mexico City, Mexico.  
Ref ID: 16523
29. Schurmann D, Rudd DJ, Zhang S, et al. Safety, pharmacokinetics, and antiretroviral activity of islatravir (ISL, MK-8591), a novel nucleoside reverse transcriptase translocation inhibitor, following single-dose administration to treatment-naïve adults infected with HIV-1: an open-label, phase 1b, consecutive-panel trial. *Lancet HIV*. 2020;7(3):e164-e172.  
Ref ID: 16524
30. Daar ES, McDonald C, Crofoot G, et al. Safety and antiviral activity over 10 days following a single dose of subcutaneous GS-6207, a first-in-class, long-acting HIV capsid inhibitor in people living with HIV. Poster presented at: 10th IAS Conference on HIV Science (IAS 2019); July 21-24, 2019;

Ref ID: 16525

31. Dhody K, Pourhassan N, Kazempour K, et al. PRO 140, a monoclonal antibody targeting CCR5, as a long-acting, single-agent maintenance therapy for HIV-1 infection. *HIV Clin Trials*. 2018;19(3):85-93.

Ref ID: 16526

32. Wang CY, Wong WW, Tsai HC, et al. Effect of anti-CD4 antibody UB-421 on HIV-1 rebound after treatment interruption. *N Engl J Med*. 2019;380(16):1535-1545.

Ref ID: 16527

33. Mendoza P, Gruell H, Nogueira L, et al. Combination therapy with anti-HIV-1 antibodies maintains viral suppression. *Nature*. 2018;561(7724):479-484.

Ref ID: 16005

34. Aberg JA, Gallant JE, Ghanem KG, Emmanuel P, Zingman BS, Horberg MA. Primary care guidelines for the management of persons infected with HIV: 2013 update by the HIV Medicine Association of the Infectious Diseases Society of America. *Clin Infect Dis*. 2014;58(1):1-10.

Ref ID: 16028

**eTable 1. Information Requested From Antiretroviral Drug Manufacturers**

| <b>Manufacturer</b>                       | <b>Information Requested</b>                                                                                                                                                                                                                                                                                                                                                                                                                                                                  | <b>Date Requested</b> | <b>Date Received</b> |
|-------------------------------------------|-----------------------------------------------------------------------------------------------------------------------------------------------------------------------------------------------------------------------------------------------------------------------------------------------------------------------------------------------------------------------------------------------------------------------------------------------------------------------------------------------|-----------------------|----------------------|
| AbbVie                                    | <ul style="list-style-type: none"><li>• Presented at national or international conferences or has been published in the peer-reviewed literature</li><li>• Data should be from prospective clinical trials (ie, properly randomized controlled trials), cohort studies, and ancillary trials (pharmacologic and drug interaction studies)</li><li>• Any information about newly recognized toxicities and complications associated with your product(s) would be helpful.</li></ul>           | 11/07/19              | N/A                  |
| Boehringer Ingelheim Pharmaceuticals, Inc | <ul style="list-style-type: none"><li>• Presented at national or international conferences or has been published in the peer-reviewed literature</li><li>• Data should be from prospective clinical trials (ie, properly randomized controlled trials), cohort studies, and ancillary trials (pharmacologic and drug interaction studies)</li><li>• Any information about newly recognized toxicities and complications associated with your product(s) would be helpful.</li><li>•</li></ul> | 11/07/19              | N/A                  |
| Bristol-Myers Squibb                      | <ul style="list-style-type: none"><li>• Presented at national or international conferences or has been published in the peer-reviewed literature</li><li>• Data should be from prospective clinical trials (ie, properly randomized controlled trials), cohort studies, and ancillary trials (pharmacologic and drug interaction studies)</li><li>• Any information about newly recognized toxicities and complications associated with your product(s) would be helpful.</li></ul>           | 11/07/19              | N/A                  |
| Gilead Sciences, Inc                      | <ul style="list-style-type: none"><li>• Presented at national or international conferences or has been published in the peer-reviewed literature</li><li>• Data should be from prospective clinical trials (ie, properly randomized controlled trials), cohort studies, and ancillary trials (pharmacologic and drug interaction studies)</li><li>• Any information about newly recognized toxicities and complications associated with your product(s) would be helpful.</li></ul>           | 11/07/19              | 12/17/19             |
| Janssen Therapeutics                      | <ul style="list-style-type: none"><li>• Presented at national or international conferences or has been published in the peer-reviewed literature</li><li>• Data should be from prospective clinical trials (ie, properly randomized controlled trials), cohort studies, and ancillary trials (pharmacologic and drug interaction studies)</li><li>• Any information about newly recognized toxicities and complications associated with your product(s) would be helpful.</li></ul>           | 11/07/19              | 01/13/20             |
| Merck & Co, Inc                           | <ul style="list-style-type: none"><li>• Presented at national or international conferences or has been published in the peer-reviewed literature</li></ul>                                                                                                                                                                                                                                                                                                                                    | 11/07/19              | 01/10/20             |

| Manufacturer      | Information Requested                                                                                                                                                                                                                                                                                                                                                                                                                                                                              | Date Requested | Date Received |
|-------------------|----------------------------------------------------------------------------------------------------------------------------------------------------------------------------------------------------------------------------------------------------------------------------------------------------------------------------------------------------------------------------------------------------------------------------------------------------------------------------------------------------|----------------|---------------|
|                   | <ul style="list-style-type: none"> <li>● Data should be from prospective clinical trials (ie, properly randomized controlled trials), cohort studies, and ancillary trials (pharmacologic and drug interaction studies)</li> <li>● Any information about newly recognized toxicities and complications associated with your product(s) would be helpful.</li> </ul>                                                                                                                                |                |               |
| Roche-Genentech   | <ul style="list-style-type: none"> <li>● Presented at national or international conferences or has been published in the peer-reviewed literature</li> <li>● Data should be from prospective clinical trials (ie, properly randomized controlled trials), cohort studies, and ancillary trials (pharmacologic and drug interaction studies)</li> <li>● Any information about newly recognized toxicities and complications associated with your product(s) would be helpful.</li> <li>●</li> </ul> | 11/07/19       | N/A           |
| Theratechnologies | <ul style="list-style-type: none"> <li>● Presented at national or international conferences or has been published in the peer-reviewed literature</li> <li>● Data should be from prospective clinical trials (ie, properly randomized controlled trials), cohort studies, and ancillary trials (pharmacologic and drug interaction studies)</li> <li>● Any information about newly recognized toxicities and complications associated with your product(s) would be helpful.</li> </ul>            | 11/07/19       | 12/17/19      |
| ViiV Healthcare   | <ul style="list-style-type: none"> <li>● Presented at national or international conferences or has been published in the peer-reviewed literature</li> <li>● Data should be from prospective clinical trials (ie, properly randomized controlled trials), cohort studies, and ancillary trials (pharmacologic and drug interaction studies)</li> <li>● Any information about newly recognized toxicities and complications associated with your product(s) would be helpful.</li> </ul>            | 11/07/19       | 12/17/19      |

**eTable 2.** Summary of Evidence Collection

| Evidence Identification                                                                                                                                       | Number of References From the Initial Search | Number of References Considered Possibly Relevant (Ultimately) |            |
|---------------------------------------------------------------------------------------------------------------------------------------------------------------|----------------------------------------------|----------------------------------------------------------------|------------|
| <b>August 2020 Submission</b>                                                                                                                                 |                                              |                                                                |            |
| Relevant published reports and meeting abstracts <ul style="list-style-type: none"> <li>• PubMed and EMBASE searches (January 2018 to August 2020)</li> </ul> | <b>&lt; 4980</b>                             | <b>549</b>                                                     |            |
| <ul style="list-style-type: none"> <li>• Panel members' identification*</li> </ul>                                                                            | ongoing                                      |                                                                |            |
| Number of relevant references reported in manuscript (submitted <b>August 2020</b> )                                                                          |                                              |                                                                | <b>105</b> |

\*Of note, individual panel members collected relevant evidence throughout the process and reviewed materials submitted by manufacturers (particularly for safety issues) and this process cannot be quantified.

**eTable 3.** Search Terms Used and Results of Embase and PubMed Literature Searches\*

**SEARCH STRATEGY (January 2018 to May 2020)**

| Search | EMBASE QUERY                                                                                                                                                                                                                                                                                                                                                                                                                                                                                                                                                                                                                                                                                                                                                                                                                                                                                                                                                                                                                                          | Results |
|--------|-------------------------------------------------------------------------------------------------------------------------------------------------------------------------------------------------------------------------------------------------------------------------------------------------------------------------------------------------------------------------------------------------------------------------------------------------------------------------------------------------------------------------------------------------------------------------------------------------------------------------------------------------------------------------------------------------------------------------------------------------------------------------------------------------------------------------------------------------------------------------------------------------------------------------------------------------------------------------------------------------------------------------------------------------------|---------|
| #1     | ('human immunodeficiency virus infection'/mj OR 'human immunodeficiency virus'/mj OR 'human immunodeficiency virus infected patient'/mj) AND ('antiretrovirus agent'/exp OR 'highly active antiretroviral therapy'/exp) AND [1-1-2018]/sd AND [english]/lim NOT ((([child]/lim OR pediatr*:ti OR paediatr*:ti OR adolescen*:ti OR child*:ti OR infan*:ti OR neonat*:ti OR newborn*:ti) NOT ([adult]/lim OR [aged]/lim OR adult*:ti)) AND ('clinical article'/de OR 'clinical trial'/de OR 'clinical trial (topic)'/de OR 'cohort analysis'/de OR 'controlled study'/de OR 'longitudinal study'/de OR 'major clinical study'/de OR 'multicenter study'/de OR 'observational study'/de OR 'practice guideline'/de OR 'prospective study'/de OR 'randomized controlled trial'/de OR 'randomized controlled trial (topic)'/de OR 'retrospective study'/de OR 'systematic review'/de) NOT ([animals]/lim NOT [humans]/lim) NOT ('conference abstract'/it OR 'conference paper'/it OR 'conference review'/it OR 'editorial'/it OR 'letter'/it OR 'note'/it) | 2848    |

| Search | PUBMED QUERY                                                                                                                                                                                                                                                                                                                                                                                                                                                                                                                                                                                                                                                                                                                                                                                                                                                                                                                                                                                                                                                                                                                                                                                                                                                                                                                                                                                                                                                                                                                                                                                                            | Results |
|--------|-------------------------------------------------------------------------------------------------------------------------------------------------------------------------------------------------------------------------------------------------------------------------------------------------------------------------------------------------------------------------------------------------------------------------------------------------------------------------------------------------------------------------------------------------------------------------------------------------------------------------------------------------------------------------------------------------------------------------------------------------------------------------------------------------------------------------------------------------------------------------------------------------------------------------------------------------------------------------------------------------------------------------------------------------------------------------------------------------------------------------------------------------------------------------------------------------------------------------------------------------------------------------------------------------------------------------------------------------------------------------------------------------------------------------------------------------------------------------------------------------------------------------------------------------------------------------------------------------------------------------|---------|
| #3     | ("Aged"[Mesh] OR senior[tw] OR "older adult"[tw] OR elderly[tw] OR geriatric[tw]) AND ("HIV Infections"[Mesh] OR "HIV positive"[tw] OR "HIV Seropositivity/diagnosis"[Mesh]) AND ("Aging"[Mesh] OR "Frailty"[Mesh] OR frailty[tw] OR "Polypharmacy"[Mesh] OR polypharmacy[tw] OR "Social Isolation"[Mesh] OR "social isolation"[tw] OR "Depression"[Mesh] OR depression[tw] OR "Cognition"[Mesh] OR "neurocognitive function"[tw] OR "Mass Screening"[Mesh]) AND ("2018/01/01"[Date - Publication] : "2020/05/31"[Date - Publication]) AND English[lang]                                                                                                                                                                                                                                                                                                                                                                                                                                                                                                                                                                                                                                                                                                                                                                                                                                                                                                                                                                                                                                                                | 336     |
| #2     | (((((("HIV Infections"[Majr]) AND "Anti-Retroviral Agents"[Mesh] AND ((Clinical Trial[ptyp] OR Comparative Study[ptyp] OR Controlled Clinical Trial[ptyp] OR Meta-Analysis[ptyp] OR Multicenter Study[ptyp] OR Randomized Controlled Trial[ptyp] OR systematic[sb]) AND hasabstract[text] AND ("2012/07/01"[PDat] : "3000/12/31"[PDat]) AND English[lang] AND adult[MeSH]))) OR (((HIV AND antiretroviral*) NOT medline[sb]) AND ((clinical[Title/Abstract] AND trial[Title/Abstract]) OR clinical trials[MeSH Terms] OR clinical trial[Publication Type] OR random*[Title/Abstract] OR random allocation[MeSH Terms] OR therapeutic use[MeSH Subheading])) AND hasabstract[text] AND ("2012/07/01"[PDat] : "3000/12/31"[PDat]))) OR (HIV Infections[majr] AND Anti-Retroviral Agents[mh] AND (Clinical Trial[ptyp] OR Comparative Study[ptyp] OR Controlled Clinical Trial[ptyp] OR Meta-Analysis[ptyp] OR Multicenter Study[ptyp] OR Randomized Controlled Trial[ptyp] OR systematic[sb]) AND ("2012/07/01"[PDat] : "3000/12/31"[PDat]) AND English[lang] NOT (child[mh] OR pediatr*[ti] OR paediatr*[ti] OR adolescen*[ti] OR child*[ti] OR infan*[ti] OR neonat*[ti] OR newborn*[ti] NOT (adult[mh] OR adult*[ti]))) OR (HIV Infections/dt[majr] AND (Clinical Trial[ptyp] OR Comparative Study[ptyp] OR Controlled Clinical Trial[ptyp] OR Meta-Analysis[ptyp] OR Multicenter Study[ptyp] OR Randomized Controlled Trial[ptyp] OR systematic[sb]) AND ("2012/07/01"[PDat] : "3000/12/31"[PDat]) AND English[lang] NOT (child[mh] OR pediatr*[ti] OR paediatr*[ti] OR adolescen*[ti] OR child*[ti] OR infan*[ti] OR | 83      |

| Search | PUBMED QUERY                                                                                                                                                                                                                                                                                                                                                                                                                                                                                                                                                                                                                                                                                                                                                                                                                                                           | Results |
|--------|------------------------------------------------------------------------------------------------------------------------------------------------------------------------------------------------------------------------------------------------------------------------------------------------------------------------------------------------------------------------------------------------------------------------------------------------------------------------------------------------------------------------------------------------------------------------------------------------------------------------------------------------------------------------------------------------------------------------------------------------------------------------------------------------------------------------------------------------------------------------|---------|
|        | neonat*[ti] OR newborn*[ti] NOT (adult[mh] OR adult*[ti])) OR (HIV Infections[majr] AND Antiretroviral Therapy, Highly Active[mh] AND (Clinical Trial[ptyp] OR Comparative Study[ptyp] OR Controlled Clinical Trial[ptyp] OR Meta-Analysis[ptyp] OR Multicenter Study[ptyp] OR Randomized Controlled Trial[ptyp] OR systematic[sb]) AND ("2012/07/01"[PDat] : "3000/12/31"[PDat]) AND English[lang] NOT (child[mh] OR pediatr*[ti] OR paediatr*[ti] OR adolescen*[ti] OR child*[ti] OR infan*[ti] OR neonat*[ti] OR newborn*[ti] NOT (adult[mh] OR adult*[ti]))) NOT letter[pt]                                                                                                                                                                                                                                                                                        |         |
| #1     | (HIV OR "HIV Infections"[Mesh]) AND (antiretroviral* OR anti-retroviral* OR "Anti-Retroviral Agents"[Mesh] OR "HIV Infections/drug therapy"[Mesh]) AND ((clinical[tiab] AND trial[tiab]) OR "clinical trials as topic"[MeSH Terms] OR random*[tiab] OR "Random Allocation"[Mesh] OR "Clinical Trial" [Publication Type] OR "Comparative Study" [Publication Type] OR "Controlled Clinical Trial" [Publication Type] OR "Meta-Analysis" [Publication Type] OR "Multicenter Study" [Publication Type] OR "Randomized Controlled Trial" [Publication Type] OR systematic[sb]) NOT ("Child"[Mesh] OR "Adolescent"[Mesh] OR "Infant"[Mesh] OR pediatr*[tiab] OR paediatr*[tiab] OR adolescen*[tiab] OR child*[tiab] OR infan*[tiab] OR neonat*[tiab] OR newborn*[tiab] NOT ("Adult"[Mesh] OR adult*[tiab])) AND English[lang] AND ("2012/07/01"[PDat] : "3000/12/31"[PDat]) | 1676    |

- Pooling and Deduplicating Embase and PubMed results for 09/17/19 through January 2020 (including "ahead of print" records): 4065
- Aging PubMed results: 336

#### SEARCH STRATEGY (August 2020)

| Search | PUBMED QUERY                                                                                                                                                                                                                                                                                                                                                                                                                                                                                                                                                                                                                                                                                                                                                                                                                                                                                                                                                                                                                                                                                                                                                                                                                                                                                                                                                                                | Results |
|--------|---------------------------------------------------------------------------------------------------------------------------------------------------------------------------------------------------------------------------------------------------------------------------------------------------------------------------------------------------------------------------------------------------------------------------------------------------------------------------------------------------------------------------------------------------------------------------------------------------------------------------------------------------------------------------------------------------------------------------------------------------------------------------------------------------------------------------------------------------------------------------------------------------------------------------------------------------------------------------------------------------------------------------------------------------------------------------------------------------------------------------------------------------------------------------------------------------------------------------------------------------------------------------------------------------------------------------------------------------------------------------------------------|---------|
| #1     | <p>("Aged"[Mesh] OR senior[tw] OR "older adult"[tw] OR elderly[tw] OR geriatric[tw]) AND ("HIV Infections"[Mesh] OR "HIV positive"[tw] OR "HIV-positive"[tw] OR "HIV Seropositivity/diagnosis"[Mesh]) AND ("Aging"[Mesh] OR "Frailty"[Mesh] OR frailty[tw] OR "Polypharmacy"[Mesh] OR polypharmacy[tw] OR "Social Isolation"[Mesh] OR "social isolation"[tw] OR "Depression"[Mesh] OR depression[tw] OR "Cognition"[Mesh] OR "neurocognitive function"[tw] OR "Mass Screening"[Mesh]) AND ("2020/01/01"[Date - Publication] : "2020/08/21"[Date - Publication]) AND English[lang]</p> <p>("HIV Infections"[Majr] OR "HIV positive"[tw] OR "HIV-positive"[tw] OR "HIV Seropositivity/diagnosis"[Mesh]) AND (antiretroviral* OR anti-retroviral* OR "Anti-Retroviral Agents"[Mesh] OR "HIV Infections/drug therapy"[Mesh]) AND ((clinical[tiab] AND trial[tiab]) OR "clinical trials as topic"[MeSH Terms] OR random*[tiab] OR "Random Allocation"[Mesh] OR "Clinical Trial" [Publication Type] OR "Comparative Study" [Publication Type] OR "Controlled Clinical Trial" [Publication Type] OR "Meta-Analysis" [Publication Type] OR "Multicenter Study" [Publication Type] OR "Randomized Controlled Trial" [Publication Type] OR systematic[sb]) NOT ("Child"[Mesh] OR "Adolescent"[Mesh] OR "Infant"[Mesh] OR pediatr*[tiab] OR paediatr*[tiab] OR adolescen*[tiab] OR child*[tiab] OR</p> | 915     |

| Search | PUBMED QUERY                                                                                                                                                                     | Results |
|--------|----------------------------------------------------------------------------------------------------------------------------------------------------------------------------------|---------|
|        | infan*[tiab] OR neonat*[tiab] OR newborn*[tiab] NOT ("Adult"[Mesh] OR adult*[tiab])) AND English[lang] AND ("2019/12/01"[Date - Publication] : "2020/08/21"[Date - Publication]) |         |

| Search | PUBMED QUERY                                                                                                                                                                                                                                                                                                                                                                                                                                                                                                                                                                                                                                                                                                                                                                                                                                                                                                                                                                                                                                                                                                                                                                                                                                                                                                                                                                                                                                                                                                                                                                    | Results |
|--------|---------------------------------------------------------------------------------------------------------------------------------------------------------------------------------------------------------------------------------------------------------------------------------------------------------------------------------------------------------------------------------------------------------------------------------------------------------------------------------------------------------------------------------------------------------------------------------------------------------------------------------------------------------------------------------------------------------------------------------------------------------------------------------------------------------------------------------------------------------------------------------------------------------------------------------------------------------------------------------------------------------------------------------------------------------------------------------------------------------------------------------------------------------------------------------------------------------------------------------------------------------------------------------------------------------------------------------------------------------------------------------------------------------------------------------------------------------------------------------------------------------------------------------------------------------------------------------|---------|
| #1     | <p>("Aged"[Mesh] OR senior[tw] OR "older adult"[tw] OR elderly[tw] OR geriatric[tw]) AND ("HIV Infections"[Mesh] OR "HIV positive"[tw] OR "HIV-positive"[tw] OR "HIV Seropositivity/diagnosis"[Mesh]) AND ("Aging"[Mesh] OR "Frailty"[Mesh] OR frailty[tw] OR "Polypharmacy"[Mesh] OR polypharmacy[tw] OR "Social Isolation"[Mesh] OR "social isolation"[tw] OR "Depression"[Mesh] OR depression[tw] OR "Cognition"[Mesh] OR "neurocognitive function"[tw] OR "Mass Screening"[Mesh]) AND ("2020/01/01"[Date - Publication] : "2020/08/21"[Date - Publication]) AND English[lang]</p> <p>("HIV Infections"[Majr] OR "HIV positive"[tw] OR "HIV-positive"[tw] OR "HIV Seropositivity/diagnosis"[Mesh]) AND (antiretroviral* OR anti-retroviral* OR "Anti-Retroviral Agents"[Mesh] OR "HIV Infections/drug therapy"[Mesh]) AND ((clinical[tiab] AND trial[tiab]) OR "clinical trials as topic"[MeSH Terms] OR random*[tiab] OR "Random Allocation"[Mesh] OR "Clinical Trial" [Publication Type] OR "Comparative Study" [Publication Type] OR "Controlled Clinical Trial" [Publication Type] OR "Meta-Analysis" [Publication Type] OR "Multicenter Study" [Publication Type] OR "Randomized Controlled Trial" [Publication Type] OR systematic[sb]) NOT ("Child"[Mesh] OR "Adolescent"[Mesh] OR "Infant"[Mesh] OR pediater*[tiab] OR paediatric*[tiab] OR adolescen*[tiab] OR child*[tiab] OR infan*[tiab] OR neonat*[tiab] OR newborn*[tiab] NOT ("Adult"[Mesh] OR adult*[tiab])) AND English[lang] AND ("2019/12/01"[Date - Publication] : "2020/08/21"[Date - Publication])</p> | 915     |

- Pooling and Deduplicating Embase and PubMed results for August 2020 (including “ahead of print” records): 915 of which 79 were considered possibly relevant and shared with panel.

**eTable 4.** Frailty Assessment Tools

| Tool                                                                                                                                                           | Variables                                                                                                                                                                                                                                                                                                                                                                                                                                                                                                                                                                                                                      | Interpretation                                                                                                                                                                                                                              |
|----------------------------------------------------------------------------------------------------------------------------------------------------------------|--------------------------------------------------------------------------------------------------------------------------------------------------------------------------------------------------------------------------------------------------------------------------------------------------------------------------------------------------------------------------------------------------------------------------------------------------------------------------------------------------------------------------------------------------------------------------------------------------------------------------------|---------------------------------------------------------------------------------------------------------------------------------------------------------------------------------------------------------------------------------------------|
| <p><b>Fried's Frailty Phenotype</b><sup>24</sup></p> <p>Consists of 5 measures of physical performance</p>                                                     | 1. Unintentional weight loss of >10 lbs (>4.5 kg) or >5% of body mass in the last year                                                                                                                                                                                                                                                                                                                                                                                                                                                                                                                                         | 1. Obtained from patient, caregiver, or medical records                                                                                                                                                                                     |
|                                                                                                                                                                | 2. Weakness (assessment based on the handgrip strength measurement)                                                                                                                                                                                                                                                                                                                                                                                                                                                                                                                                                            | 2. Interpretation of results takes into account sex and body mass index                                                                                                                                                                     |
|                                                                                                                                                                | 3. Exhaustion scale                                                                                                                                                                                                                                                                                                                                                                                                                                                                                                                                                                                                            | 3. Self-report based on 2 questions from Center for Epidemiological Studies Depression (CES-D)                                                                                                                                              |
|                                                                                                                                                                | 4. Slow gait (walking time over a distance of 15 feet [4.5 meters])                                                                                                                                                                                                                                                                                                                                                                                                                                                                                                                                                            | 4. Takes into account sex and height; slow if $\geq 15.3$ seconds if height $\leq 173$ cm ( $\leq 159$ cm in women), and $\geq 13.1$ seconds if height $> 173$ cm in men ( $> 159$ cm in women)                                             |
|                                                                                                                                                                | 5. Low physical activity                                                                                                                                                                                                                                                                                                                                                                                                                                                                                                                                                                                                       | 5. Energy expenditure $< 383$ kcal/week for men and $< 270$ kcal/week for women, based on the modified Minnesota Leisure Time Activity Questionnaire.                                                                                       |
| <p><b>Short Physical Performance Battery (SPPB)</b><sup>25</sup></p> <p>Consists of 3 assessments of time to complete a task or ability to complete a task</p> | <p>1. Repeated chair stands (from sitting position, stand then sit 5 times)</p> <p>2. Balance tests (stand with feet side-by-side for 10 seconds, if able to do side-by-side move to stand with feet semi-tandem (one foot in front of the other foot, with big toe touching heel of the other foot) and then tandem (1 foot directly behind other foot with all toes touching heel of the other foot) for 10 seconds)</p> <p>3. A 4-meter (10-foot) walk test</p> <p>Available at:<br/> <a href="https://geriatrictoolkit.missouri.edu/SPPB-Score-Tool.pdf">https://geriatrictoolkit.missouri.edu/SPPB-Score-Tool.pdf</a></p> | <p>A final summary performance score out of 12 is calculated.</p> <p>In order to classify people as frail, prefrail and nonfrail, the following cutoffs are used:<br/> SPPB 0-6 (frail), SPPB 7-9 (prefrail), SPPB 10 to 12 (nonfrail).</p> |

| <b>Tool</b>                                                                                            | <b>Variables</b>                                                                                                                                                                                                       | <b>Interpretation</b>                                                                                                                                                                                                         |
|--------------------------------------------------------------------------------------------------------|------------------------------------------------------------------------------------------------------------------------------------------------------------------------------------------------------------------------|-------------------------------------------------------------------------------------------------------------------------------------------------------------------------------------------------------------------------------|
| <p><b>Frailty Index</b><sup>26</sup></p> <p>Consists of 37 health variables falling into 3 domains</p> | <ol style="list-style-type: none"> <li>1. Physical (18 variables)</li> <li>2. Psychological (5 variables)</li> <li>3. Social/Functional (14 variables)</li> </ol> <p>[See eTable 5 below for listing of variables]</p> | <p>The Frailty Index score (between 0-1) is derived from the number of deficits divided by the number of health variables assessed.</p> <p>&lt;.08 = robust<br/>         .08 to .24 = prefrail<br/>         ≥ .25 = frail</p> |

**eTable 5.** Frailty Index Variables

| <b>Domain</b>                                                         | <b>Deficit Cut-off</b>                                                      |
|-----------------------------------------------------------------------|-----------------------------------------------------------------------------|
| <b>Physical Domain</b>                                                |                                                                             |
| Lost more than 5 kg in the last year                                  | Yes = 1; No = 0                                                             |
| Stayed in bed at least half the day due to health (in the last month) | Yes = 1; No = 0                                                             |
| Cut down in usual activity (in the last month)                        | Yes = 1; No = 0                                                             |
| Walk outside                                                          | <3 days = 1; ≥3 days = 0                                                    |
| High blood pressure                                                   | Yes = 1; Suspected = 0.5; No = 0                                            |
| Congestive heart failure                                              | Yes = 1; No = 0                                                             |
| Stroke                                                                | Yes = 1; No = 0                                                             |
| Cancer                                                                | Yes = 1; No = 0                                                             |
| Diabetes                                                              | Yes = 1; Suspected = 0.5; No = 0                                            |
| Osteoarthritis                                                        | Yes = 1; Suspected = 0.5; No = 0                                            |
| Chronic lung disease                                                  | Yes = 1; No = 0                                                             |
| MMSE                                                                  | <10 = 1; 11-17 = 0.75; 18-20 = 0.5; 20-24 = 0.25; >24 = 0                   |
| Urinary incontinence                                                  | Yes = 1; No = 0                                                             |
| BMI                                                                   | 18.5 - <25 = 0; 25 - <30 = 0.5; ≥30 = 1; <18.5 = 1                          |
| Grip Strength (GS)                                                    | If BMI ≤24, GS ≤29 = 1; If BMI >24 - 28, GS ≤30 = 1; If BMI >28, GS ≤32 = 1 |
| Timed gait (TG) of 10 m, usual pace                                   | If height ≤173 cm, TG ≥15.3 s = 1; If height >173 cm, TG ≥13.1s = 1         |
| Self rating of health                                                 | Poor = 1; Fair = 0.75; Good = 0.5; Very Good = 0.25; Excellent = 0          |
| How health has changed in the last year                               | Worse = 1; Better/Same = 0                                                  |
| <b>Psychologic Domain</b>                                             |                                                                             |
| Feel everything is an effort                                          | Most of the time = 1; Sometimes = 0.5; Rarely = 0                           |
| Feel depressed                                                        | Most of the time = 1; Sometimes = 0.5; Rarely = 0                           |
| Feel happy                                                            | Most of the time = 0; Sometimes = 0.5; Rarely = 1                           |
| Feel lonely                                                           | Most of the time = 1; Sometimes = 0.5; Rarely = 0                           |
| Have trouble getting going                                            | Most of the time = 1; Sometimes = 0.5; Rarely = 0                           |
| <b>Social/Functional Domain (Activities of Daily Living)</b>          |                                                                             |
| Help bathing                                                          | Yes = 1; No = 0                                                             |
| Help dressing                                                         | Yes = 1; No = 0                                                             |
| Help getting in/out of a chair                                        | Yes = 1; No = 0                                                             |
| Help walking around the house                                         | Yes = 1; No = 0                                                             |
| Help eating                                                           | Yes = 1; No = 0                                                             |
| Help grooming                                                         | Yes = 1; No = 0                                                             |
| Help using the toilet                                                 | Yes = 1; No = 0                                                             |
| Help up/down stairs                                                   | Yes = 1; No = 0                                                             |
| Help lifting 5 kg                                                     | Yes = 1; No = 0                                                             |
| Help shopping                                                         | Yes = 1; No = 0                                                             |
| Help with housework                                                   | Yes = 1; No = 0                                                             |
| Help with meal preparation                                            | Yes = 1; No = 0                                                             |
| Help taking medications                                               | Yes = 1; No = 0                                                             |
| Help with finances                                                    | Yes = 1; No = 0                                                             |

Abbreviations: BMI, body mass index; MMSE, mini-mental state examination. Adapted from: Searle SD, et al. *BMC geriatrics*. 2008.<sup>26</sup>

**eTable 6.** Selected Novel Antiretroviral Agents in Clinical Development

| <b>Agent</b>                                         | <b>Mechanism of Action</b>                     | <b>Stage of Development</b> | <b>Mode of administration</b>                     | <b>Patient populations under study; trial number at <a href="http://clinicaltrials.gov">clinicaltrials.gov</a></b>                  |
|------------------------------------------------------|------------------------------------------------|-----------------------------|---------------------------------------------------|-------------------------------------------------------------------------------------------------------------------------------------|
| Islatravir <sup>27-29</sup>                          | NRTTI                                          | Phase III                   | Oral once daily, once weekly, once monthly (PrEP) | Treatment naive, switch and HTE patients, PrEP;<br>NCT04233879<br>NCT04223778<br>NCT04233216<br>NCT04003103                         |
| GS 6207 <sup>30</sup>                                | Capsid inhibitor                               | Phase IIb                   | Oral and subcutaneous every 6 months              | Treatment-naive and HTE patients;<br>NCT04143594<br>NCT04150068                                                                     |
| Leronlimab <sup>31</sup>                             | CCR5- binding mAb blocking HIV entry           | Phase IIb/III               | Weekly subcutaneous injection                     | HTE patients and as single-agent maintenance therapy;<br>NCT03902522<br>NCT02859961                                                 |
| UB-421 <sup>32</sup>                                 | CD4-binding mAb blocking HIV entry             | Phase II                    | Weekly IV infusion                                | HTE patients and as single agent maintenance therapy;<br>NCT04406727<br>NCT03149211                                                 |
| Broadly HIV neutralizing antibodies <sup>33,34</sup> | Bind HIV envelope trimer at different epitopes | Phase I/II                  | IV and subcutaneous infusion                      | Maintenance of suppression, clearance of HIV reservoir, HIV prevention;<br>NCT03739996<br>NCT04340596<br>NCT02568215<br>NCT02716675 |

NRTTI = nucleoside reverse transcriptase translocation inhibitor

HTE= heavily treatment experienced

mAb = monoclonal antibody
